# Supplementary material for: Hierarchically porous nanostructures through phosphonate–metal alkoxide condensation and growth using functionalized dendrimeric building blocks
Source: Royal Society of Chemistry journal article supplement (doi:10.1039/c1cc12310f), 2011-01-01
Supplement: c1cc12310f.pdf [file c1cc12310f.pdf]

## **Hierarchically Porous Nanostructures through Phosphonate-Metal Alkoxide Condensation and Growth Using Functionalized Dendrimeric Building Blocks**

Younes Brahmi,<sup>a</sup> Nadia Katir,<sup>a,b</sup> Aurelien Hameau,<sup>a,b</sup> Abdellatif Essoumhi,<sup>a</sup> El Mokhtar Essassi,<sup>a</sup>  
Anne-Marie Caminade,<sup>b</sup> Mosto Bousmina,<sup>a</sup> Jean-Pierre Majoral,<sup>\*a,b</sup> and Abdelkrim El Kadib<sup>\*a</sup>

### Electronic Supplementary Information

- S1: Synthesis and characterization of the starting dendrimers**
- S2: <sup>13</sup>C MAS NMR of hybrid materials**
- S3: <sup>31</sup>P MAS NMR of hybrid materials**
- S4: FTIR of hybrid materials**
- S5: SEM analysis of hybrid materials**
- S6: TEM analysis of hybrid materials**
- S7: X-ray diffraction analysis of hybrid materials**
- S8: EDX analysis of hybrid materials**
- S9: Nitrogen sorption analysis of hybrid materials**
- S10: TG analysis of hybrid materials**
- S11: X-ray analysis after calcinations.**

## S1 : Synthesis and characterization of the starting dendrimers

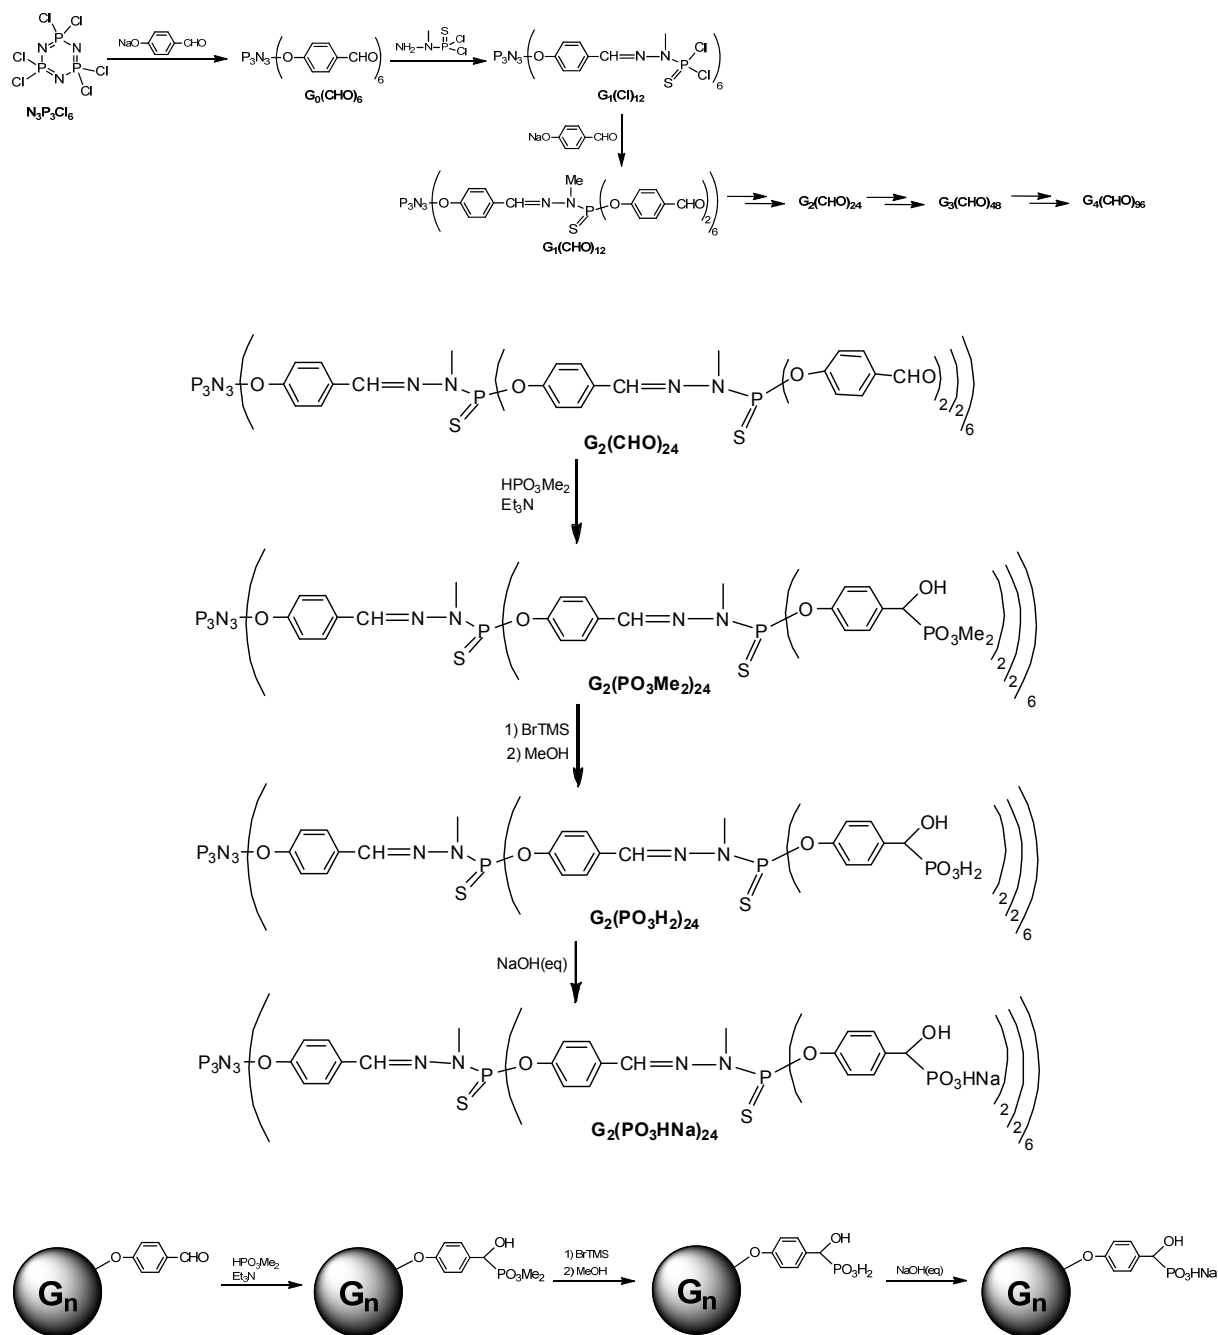

### General

dendrimers  $G_n(\text{CHO})$  were synthesized using published procedures [1]. All manipulations were carried out with standard high-vacuum and dry-argon techniques. Chemicals were purchased from Sigma-Aldrich or Strem and used without further purification; solvents were

dried and distilled by routine procedures.  $^1\text{H}$ ,  $^{13}\text{C}$ , and  $^{31}\text{P}$  NMR spectra were recorded at  $25^\circ\text{C}$  with Bruker AC 200, ARX 250, AV 300, DPX 300, AMX 400 or AV500 spectrometers. References for NMR chemical shifts are 85%  $\text{H}_3\text{PO}_4$  for  $^{31}\text{P}$  NMR and  $\text{SiMe}_4$  for  $^1\text{H}$  and  $^{13}\text{C}$  NMR. Fourier transformed infrared (FTIR) spectra were obtained with a Perkin-Elmer Spectrum 100FT-IR spectrometer on neat samples (ATR FT-IR). The numbering used for NMR is shown on the following Figure.

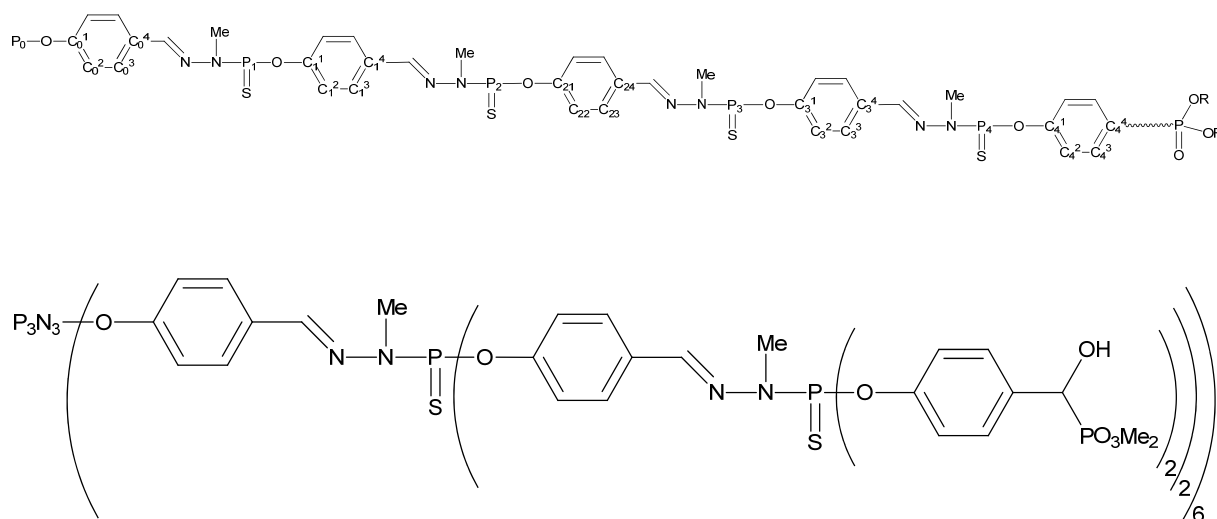

Dendrimer  $\text{G}_2(\text{CHO})_{24}$  (1.00 g, 0.146 mmol) was dissolved in THF (1 mL) then triethylamine (15  $\mu\text{L}$ , 1.3 mmol) and dimethylphosphite (319  $\mu\text{L}$ , 3.5 mmol) were added to the reaction mixture and left overnight under good stirring. The residue was washed by a mixture of THF/ $\text{Et}_2\text{O}$  (1/1) to afford the desired compound as a white powder in 80% yield.  $^{31}\text{P}$ - $\{^1\text{H}\}$  NMR (DMSO  $d_6$ ):  $\delta = 11.7$  (s,  $\text{P}_0$ ), 27.10 (s,  $\text{P}(\text{O})(\text{O}-\text{CH}_3)_2$ ), 66.1 (s,  $\text{P}_{1,2}$ ).  $^1\text{H}$  NMR (DMSO  $d_6$ ):  $\delta = 3.29$  (d,  $^3J_{\text{HP}} = 9.2$  Hz, 54H,  $\text{CH}_3\text{-N-P}_1$ ,  $\text{CH}_3\text{-N-P}_2$ ), 3.49 (d,  $^2J_{\text{CP}} = 10.9$  Hz, 72H,  $\text{P}(\text{O})\text{-O-CH}_3$ ), 3.55 (d,  $^2J_{\text{CP}} = 10.6$  Hz, 72H,  $\text{P}(\text{O})\text{-O-CH}_3$ ), 5.00 (dd,  $^3J_{\text{HH}} = 5.4$  Hz,  $^2J_{\text{HP}} = 15.7$  Hz, 24H,  $\text{CH-P}(\text{O})$ ), 6.30 (dd,  $^3J_{\text{HH}} = 5.4$  Hz,  $^2J_{\text{HP}} = 15.7$  Hz, 24H, OH), 7.0-8.0 (m, 186H,  $\text{H}_{\text{arom}}$ ,  $\text{CH=N}$ ).  $^{13}\text{C}$   $\{^1\text{H}\}$  NMR (DMSO  $d_6$ ):  $\delta = 32.8$  (d,  $^2J_{\text{CP}} = 11.3$  Hz,  $\text{CH}_3\text{-N-P}_{1,2}$ ), 52.7 (d,  $^2J_{\text{CP}} = 6.2$  Hz,  $\text{CH}_3\text{-O-P}(\text{O})$ ), 53.2 (d,  $^2J_{\text{CP}} = 6.3$  Hz,  $\text{CH}_3\text{-O-P}(\text{O})$ ), 68.2 (d,  $^1J_{\text{CP}} = 163.0$  Hz, C-OH), 120.4 (s,  $\text{C}_2^2$ ), 120.8 (br,  $\text{C}_0^2$ ), 121.4 (s,  $\text{C}_1^2$ ), 128.2 (s,  $\text{C}_0^3$ ), 128.2 (s,  $\text{C}_1^3$ ), 128.7 (d,  $^3J_{\text{CP}} = 3.7$  Hz,  $\text{C}_2^3$ ), 132.1 (s,  $\text{C}_0^4$ ), 132.1 (s,  $\text{C}_1^4$ ), 135.4 (s,  $\text{C}_2^4$ ), 140.2 (br,  $\text{CH=N-N}(\text{Me})\text{-P}_{1,2}$ ), 149.4 (d,  $^2J_{\text{CP}} = 3.8$  Hz,  $\text{C}_2^1$ ), 150.4 (s,  $\text{C}_0^1$ ), 150.7 (d,  $^2J_{\text{CP}} = 6.4$  Hz,  $\text{C}_1^1$ ). IR:  $\nu(\text{OH})$  3271  $\text{cm}^{-1}$ .

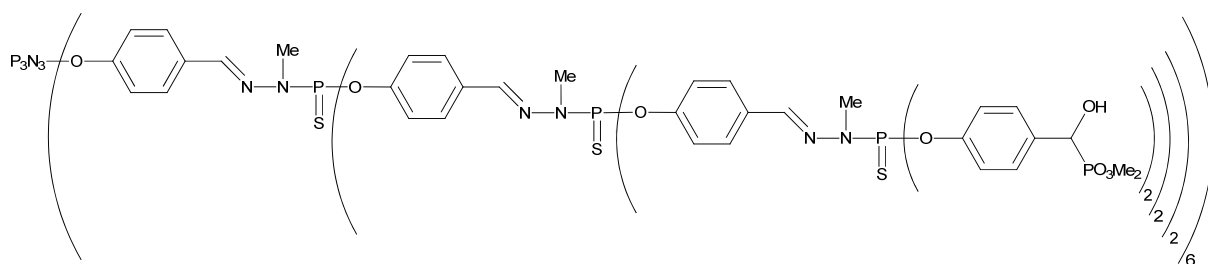

Dendrimer  $G_3(\text{CHO})_{48}$  (0.20 g,  $1.35 \cdot 10^{-2}$  mmol) was dissolved in THF (0.2 mL). Then triethylamine (10  $\mu\text{L}$ , 0.80 mmol) and dimethylphosphite (59  $\mu\text{L}$  0.648 mmol,) were added to the reaction mixture and left 12h under good stirring. The residue was washed by a mixture of THF/Et<sub>2</sub>O (1/1) to afford the desired compound as a white powder in 85% yield.  $^{31}\text{P}\{-^1\text{H}\}$  NMR (DMSO d<sub>6</sub>):  $\delta$  = 11.7 (s, P<sub>0</sub>), 28.6 (s, P(O)(O-CH<sub>3</sub>)<sub>2</sub>), 66.4 (s, P<sub>1,2,3</sub>).  $^1\text{H}$  NMR (DMSO d<sub>6</sub>):  $\delta$  = 3.40 (d,  $^3J_{\text{HP}}$  = 10.7 Hz, 126H, CH<sub>3</sub>-N-P<sub>1</sub>, CH<sub>3</sub>-N-P<sub>2</sub>, CH<sub>3</sub>-N-P<sub>3</sub>), 3.60 (d,  $^2J_{\text{CP}}$  = 13.2 Hz, 144H, P(O)-O-CH<sub>3</sub>), 3.65 (d,  $^2J_{\text{CP}}$  = 13.2 Hz, 144H, P(O)-O-CH<sub>3</sub>), 5.10 (dd,  $^3J_{\text{HH}}$  = 4.3 Hz,  $^2J_{\text{HP}}$  = 15.3 Hz, 48H, CH-P(O)), 6.4 (dd,  $^3J_{\text{HH}}$  = 4.3 Hz,  $^2J_{\text{HP}}$  = 15.3 Hz, 48H, OH), 7.0-8.1 (m, 402H, H<sub>arom</sub>, CH=N).  $^{13}\text{C}\{^1\text{H}\}$  NMR (DMSO d<sub>6</sub>):  $\delta$  = 32.8 (br, CH<sub>3</sub>-N-P<sub>1,2,3</sub>), 52.7 (d,  $^2J_{\text{CP}}$  = 6.3 Hz, CH<sub>3</sub>-O-P(O)), 53.2 (d,  $^2J_{\text{CP}}$  = 7.4 Hz, CH<sub>3</sub>-O-P(O)), 68.1 (d,  $^1J_{\text{CP}}$  = 162.8 Hz, CH-OH), 119.5 (s, C<sub>1</sub><sup>2</sup>), 120.4 (br, C<sub>3</sub><sup>2</sup>, C<sub>0</sub><sup>2</sup>), 121.4 (s, C<sub>2</sub><sup>2</sup>), 128.3 (br, C<sub>0</sub><sup>3</sup>, C<sub>1</sub><sup>3</sup>, C<sub>2</sub><sup>3</sup>), 128.6 (d,  $^3J_{\text{CP}}$  = 4.2 Hz, C<sub>3</sub><sup>3</sup>), 132.1 (s, C<sub>0</sub><sup>4</sup>, C<sub>1</sub><sup>4</sup>, C<sub>2</sub><sup>4</sup>), 135.5 (s, C<sub>3</sub><sup>4</sup>), 140.2 (br, CH=N-N(Me)-P<sub>1,2,3</sub>), 149.4 (d,  $^2J_{\text{CP}}$  = 8.3 Hz, C<sub>3</sub><sup>1</sup>), 150.6 (br, C<sub>0</sub><sup>1</sup>, C<sub>1</sub><sup>1</sup>, C<sub>2</sub><sup>1</sup>). IR:  $\nu(\text{OH})$  3271 cm<sup>-1</sup>.

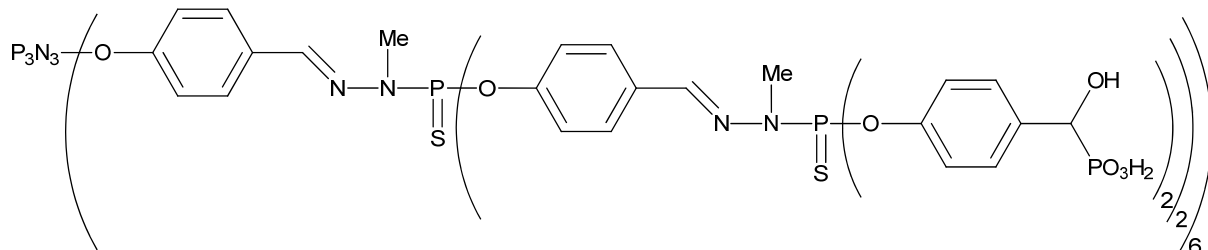

At 0°C (ice bath) the bromotrimethylsilane (304  $\mu\text{L}$ , 2.3 mmol), was added slowly to a suspension of dendrimer  $G_2(\text{PO}_3\text{Me}_2)_{24}$  (0.3 g,  $3.16 \cdot 10^{-2}$  mmol) in acetonitrile (1.5 mL) and triethylamine (304  $\mu\text{L}$ , 2.3 mmol). The reaction mixture was left to react for 6 h at room temperature. Then the anhydrous methanol (1 mL) was added. After 2h, the reaction mixture was evaporated to dryness under reduced pressure. The residue was washed with water and ether and final compound was obtained as a white powder with a yield of 62%.  $^{31}\text{P}\{-^1\text{H}\}$  NMR (DMSO d<sub>6</sub>):  $\delta$  = 11.9 (s, P<sub>0</sub>), 21.5 (m, P(O)(OH)<sub>2</sub>), 66.00 (s, P<sub>1,2</sub>).  $^1\text{H}$  NMR (DMSO d<sub>6</sub>):  $\delta$  = 3.06 (br, 54H, CH<sub>3</sub>-N-P<sub>1,2</sub>), 4.66 (d,  $^3J_{\text{HP}}$  = 14.0 Hz, 24H, CH-OH), 3.7-5.2 (m, 72H, OH), 6.7-8.0 (m, 186H, H<sub>arom</sub> CH=N).  $^{13}\text{C}\{^1\text{H}\}$  NMR (DMSO d<sub>6</sub>):  $\delta$  = 33.6 (s, CH<sub>3</sub>-N-P<sub>1,2</sub>),

70.2 (d,  $^1J_{CP} = 158.5$  Hz, CH-OH), 121.0 (br, C<sub>2</sub><sup>2</sup>, C<sub>0</sub><sup>2</sup>), 122.0 (s, C<sub>1</sub><sup>2</sup>), 129.5 (br, C<sub>0</sub><sup>3</sup>, C<sub>1</sub><sup>3</sup>, C<sub>2</sub><sup>3</sup>), 132.8 (s, C<sub>0</sub><sup>4</sup>, C<sub>1</sub><sup>4</sup>), 137.4 (s, C<sub>2</sub><sup>4</sup>), 141.0 (br, CH=N), 149.8 (br, C<sub>2</sub><sup>1</sup>), 151.2 (br, C<sub>0</sub><sup>1</sup>, C<sub>1</sub><sup>1</sup>).  
IR: ν(OH) 3271 cm<sup>-1</sup>.

[1] a) N. Launay, A. M. Caminade, R. Lahana, J. P. Majoral, *Angew. Chem. Int. Ed. Engl.*, 1994, **33**, 1589-1592.

## S2: $^{13}\text{C}$ MAS NMR of hybrid materials

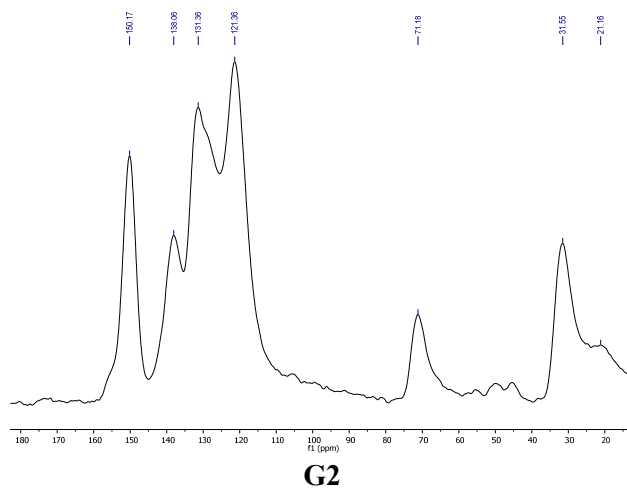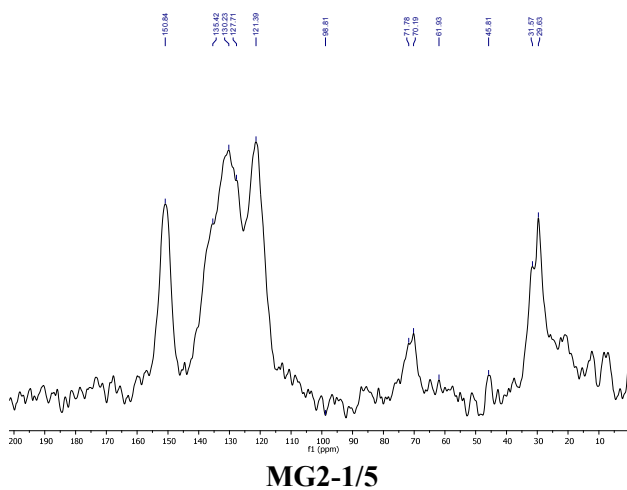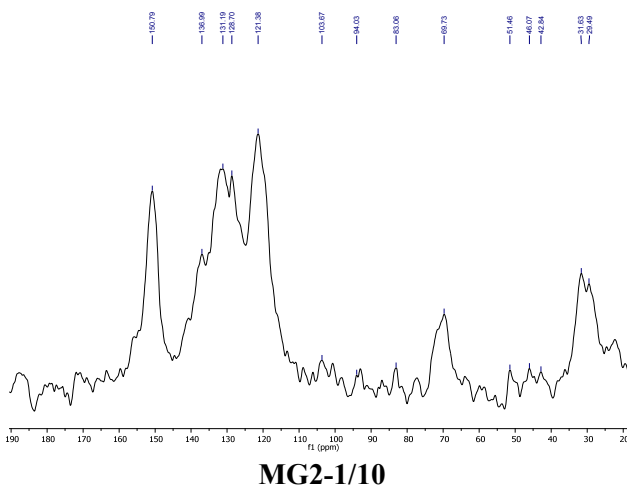

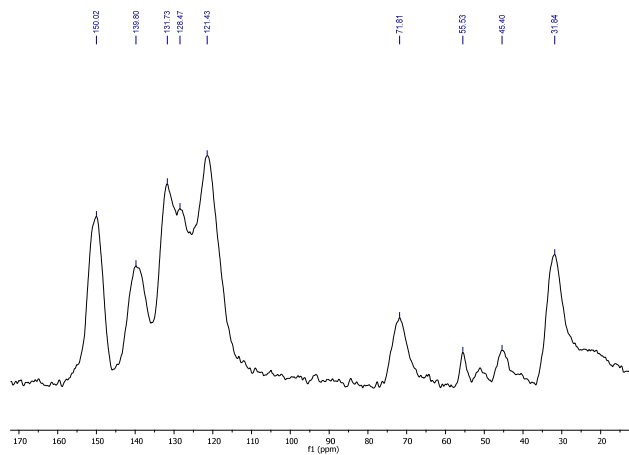

**G4**

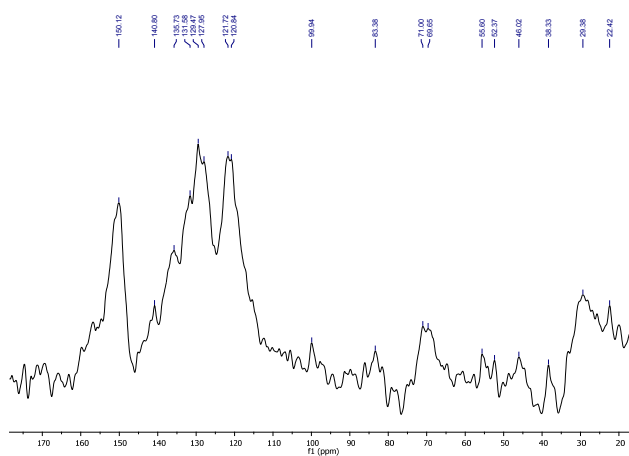

**MG4-1/5**

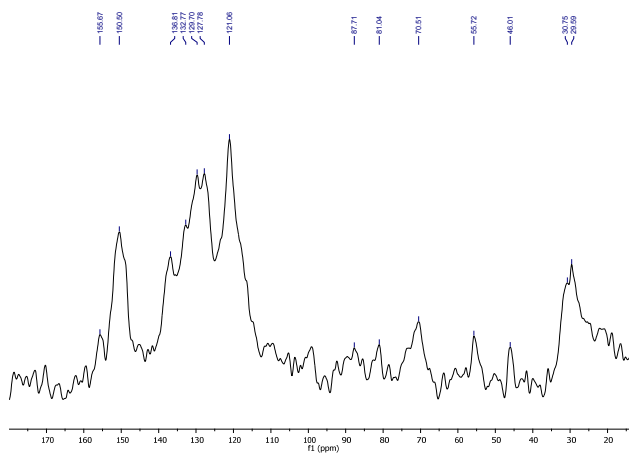

**MG4-1/10**

### S3: $^{31}\text{P}$ MAS NMR of hybrid materials

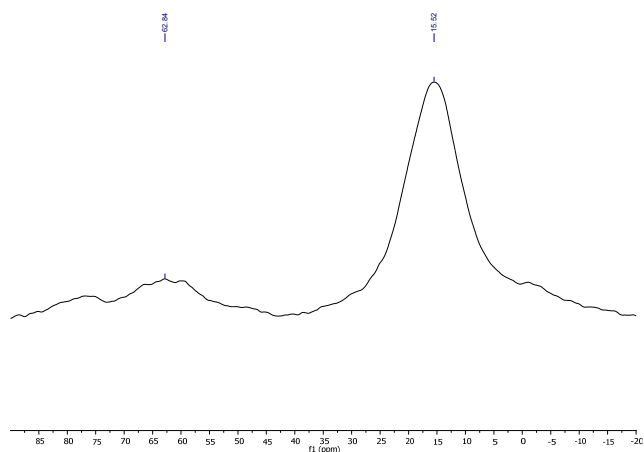

**MG4-1/10**

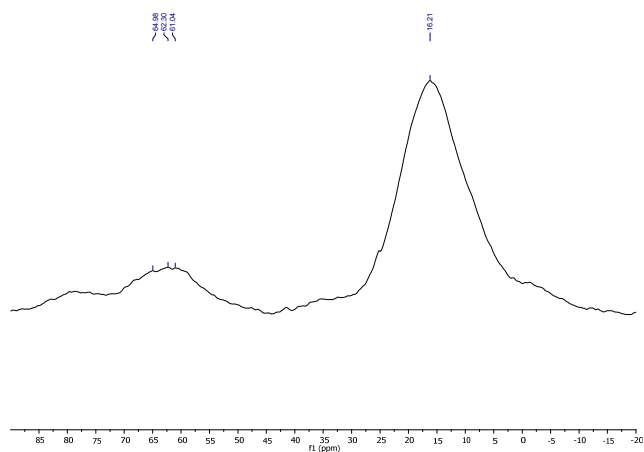

**MG4-1/5**

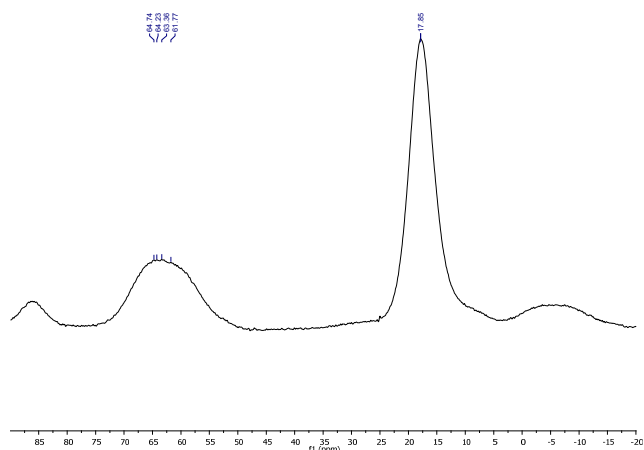

**G4**





#### S4: FTIR of hybrid materials

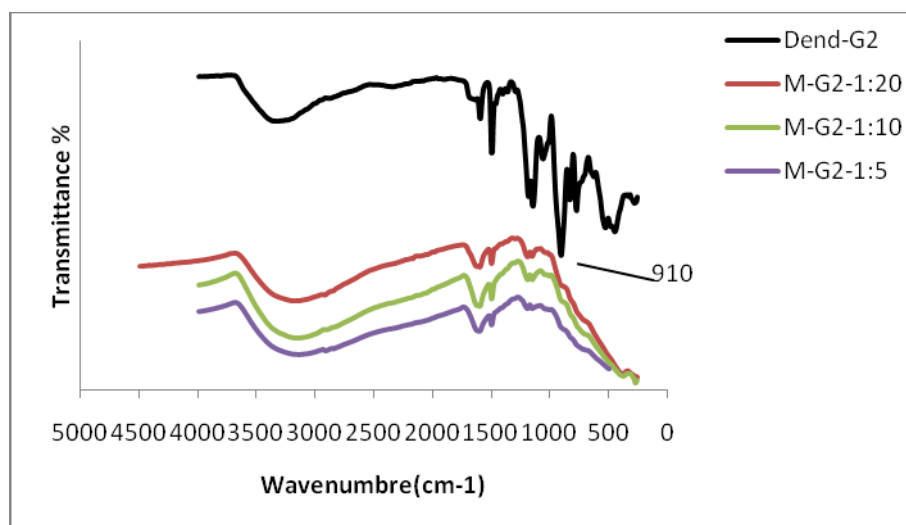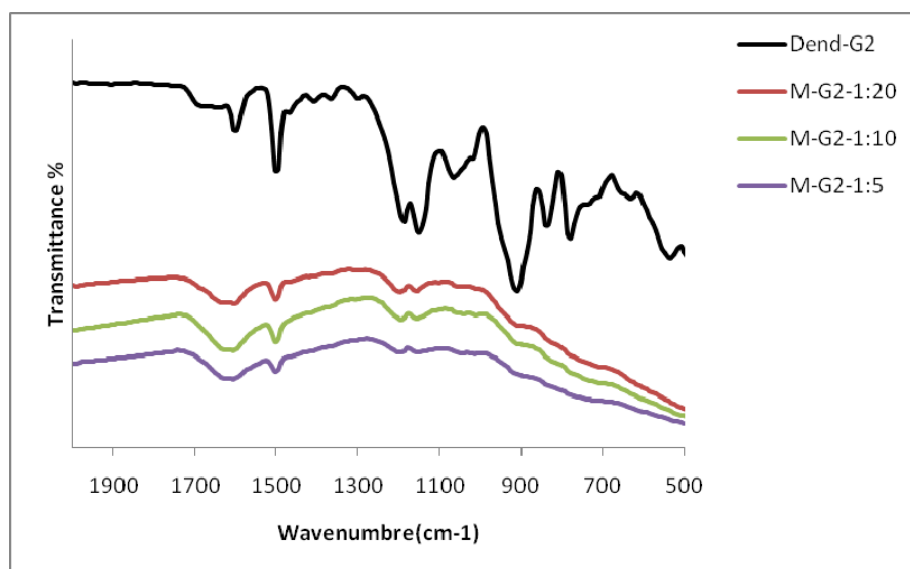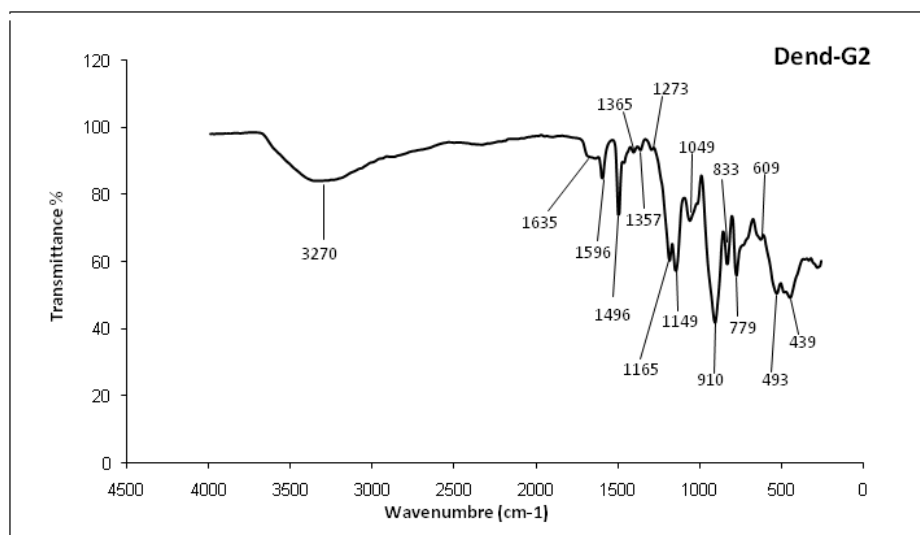

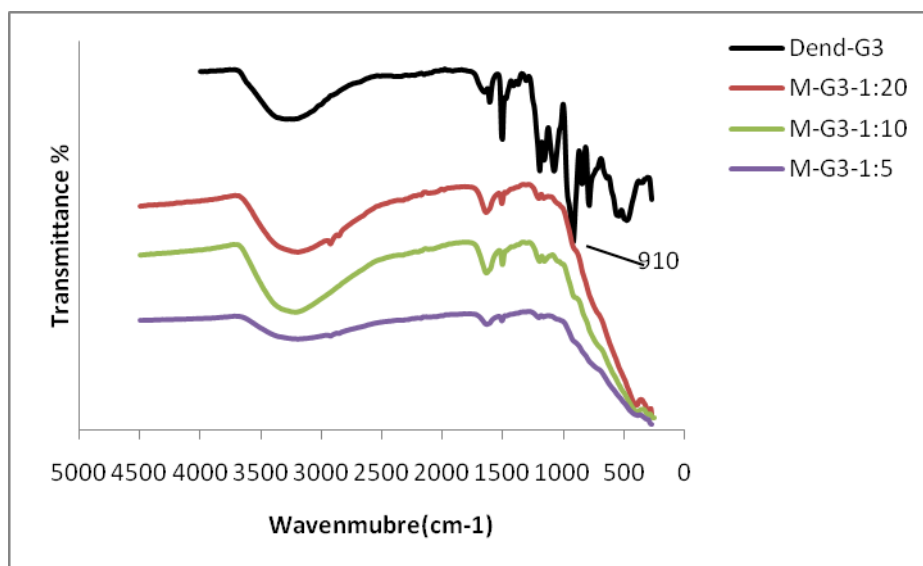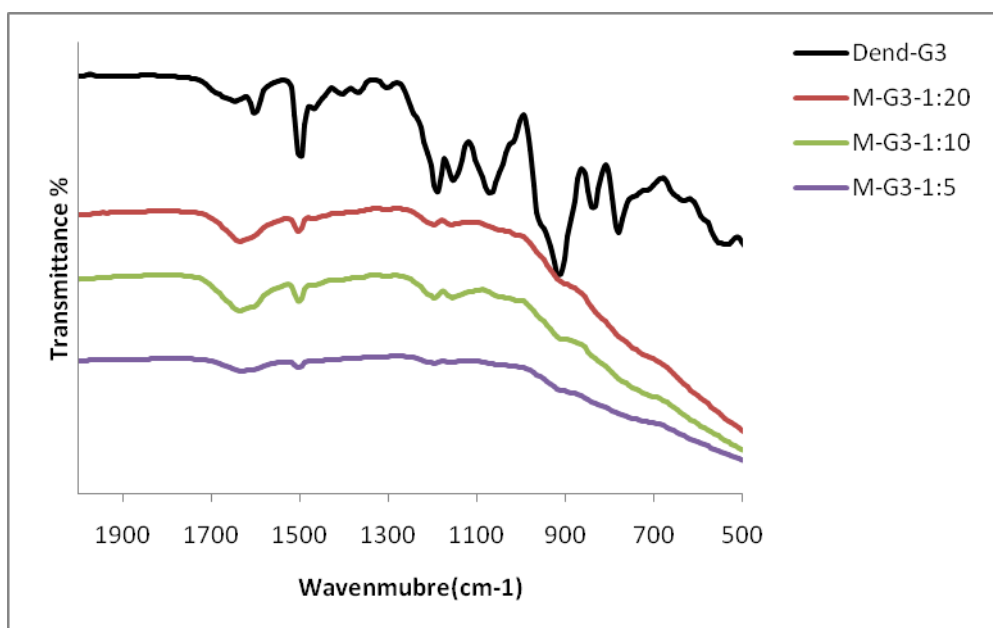

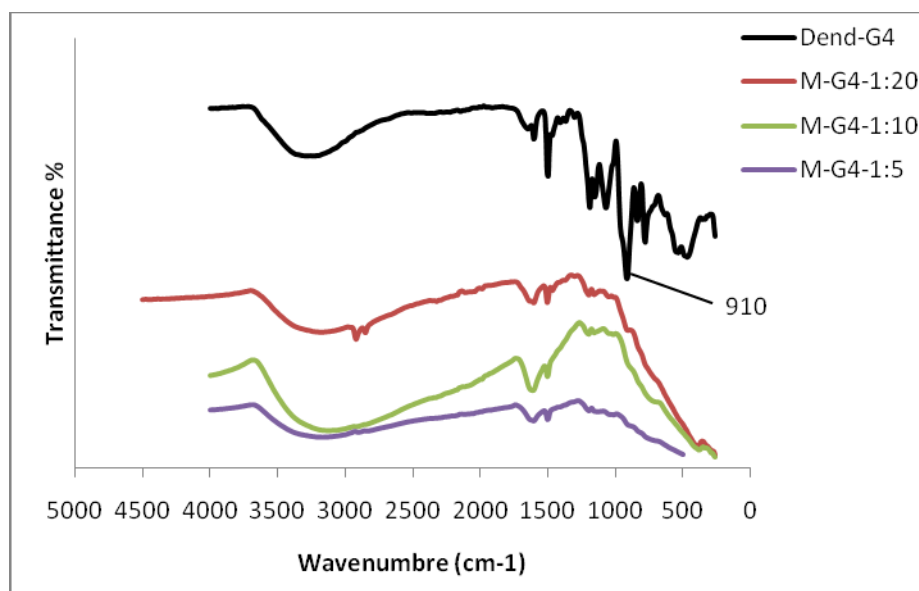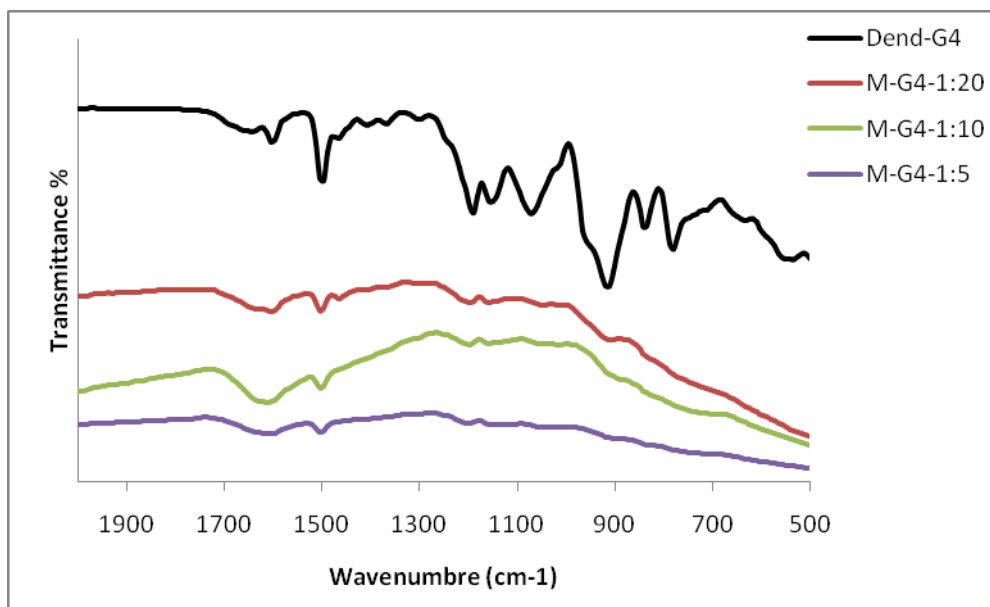

## S5: SEM analysis of hybrid materials

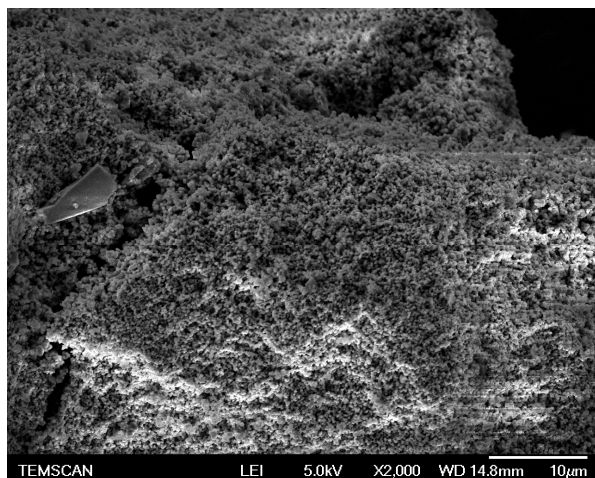

**M-G3-1/10**

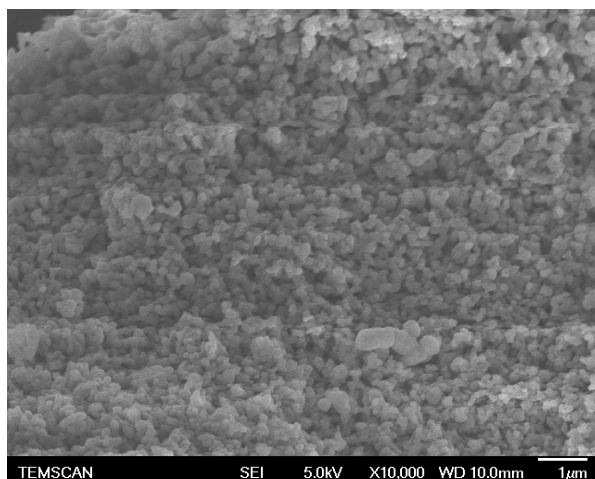

**M-G2-1/5**

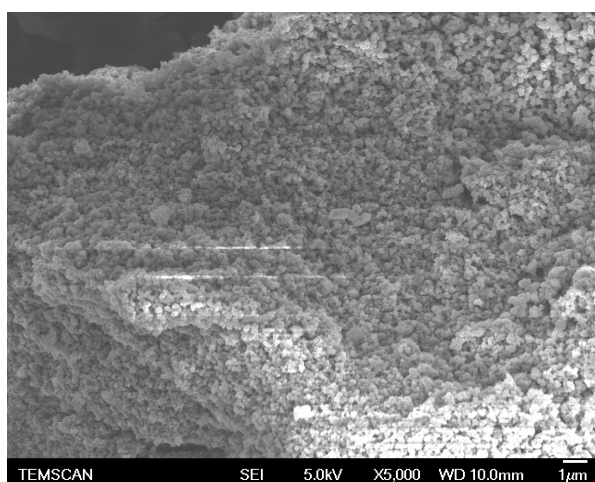

**M-G4-1/5**

### S6: TEM analysis of hybrid materials

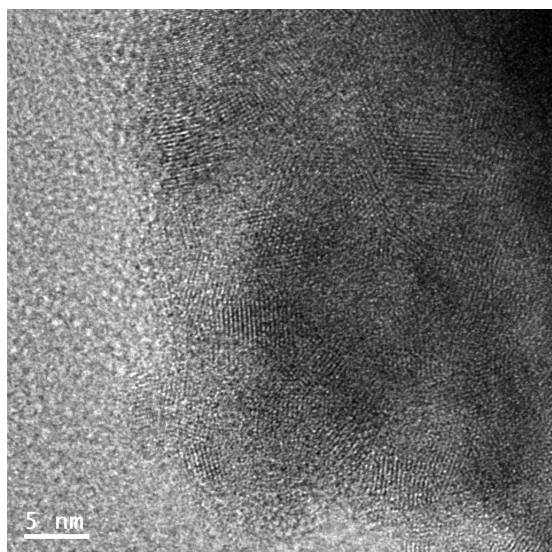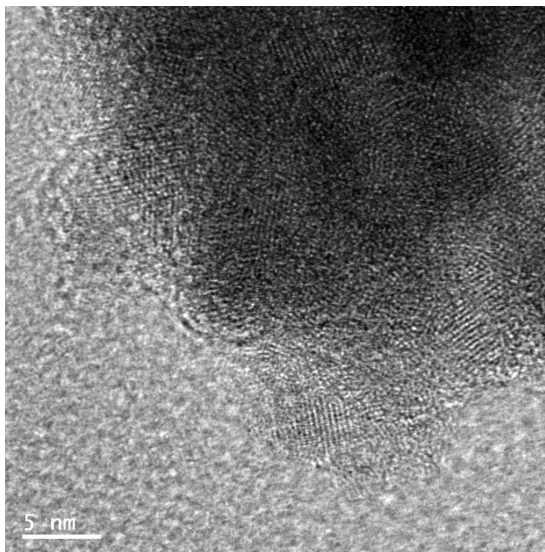

### MG4-1/5

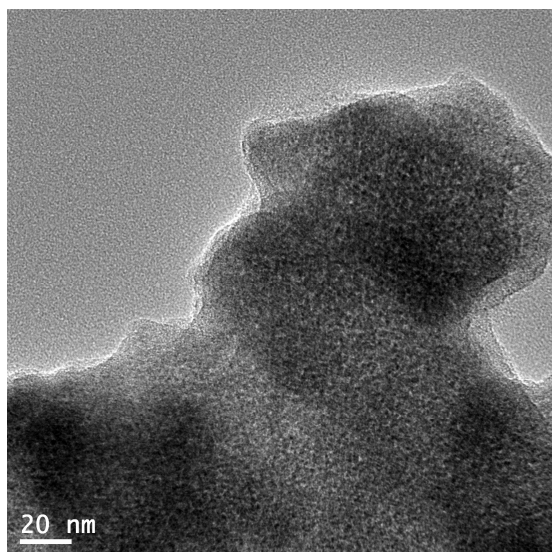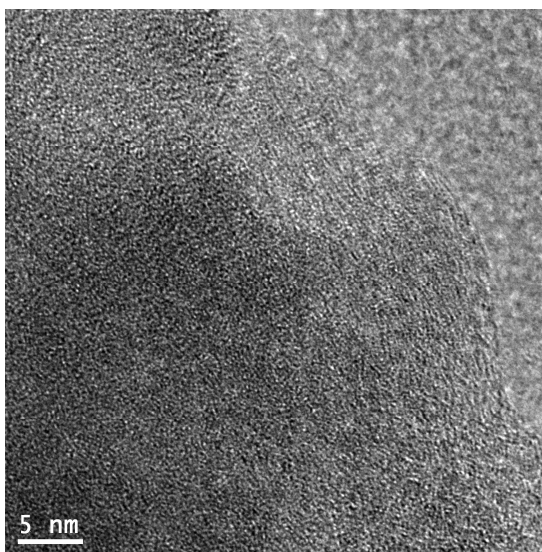

### MG3-1/5

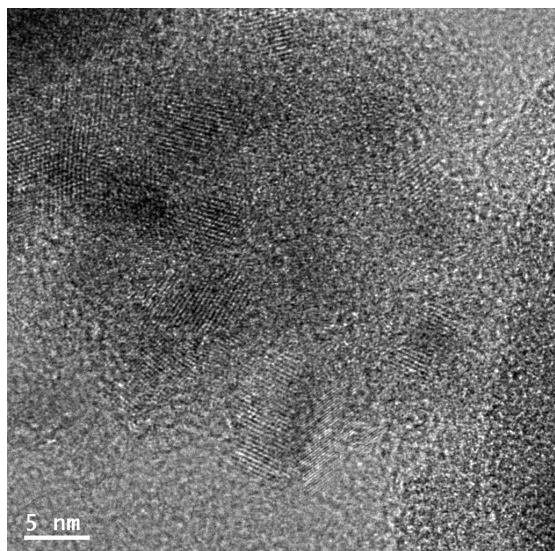

**MG4-1/10**

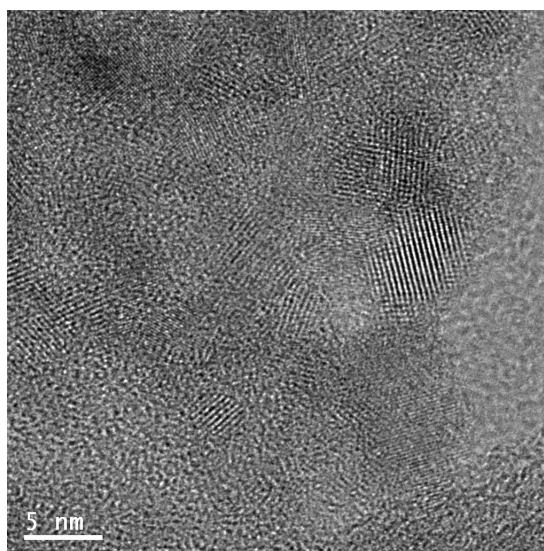

**MG2-1/10**

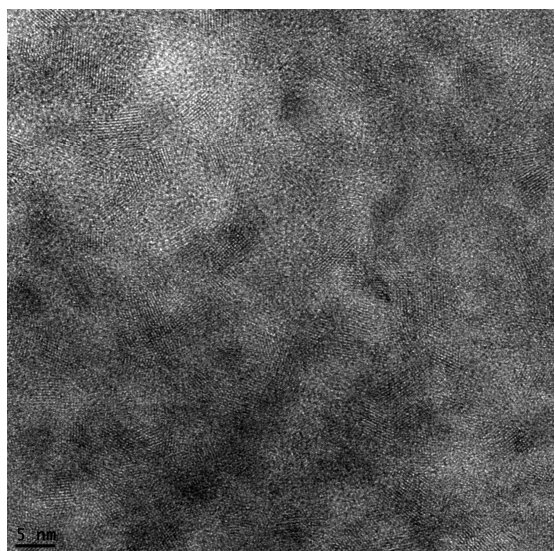

**MG3-1/10**

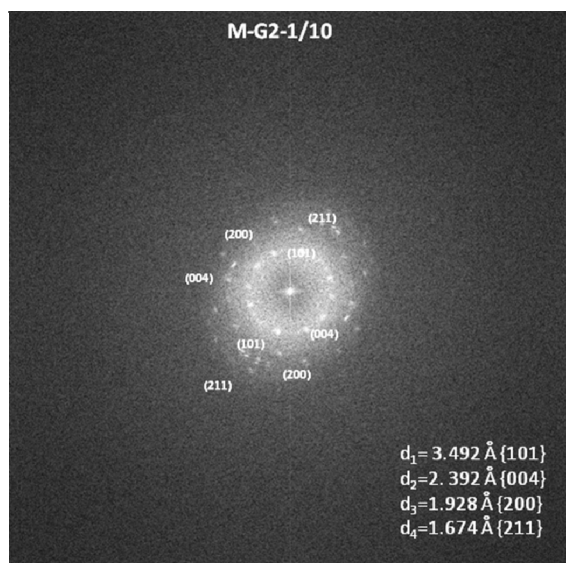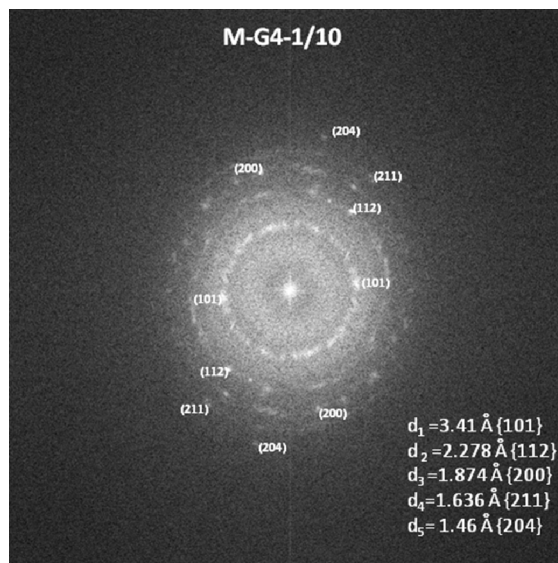



## S7: X-ray diffraction analysis of hybrid materials

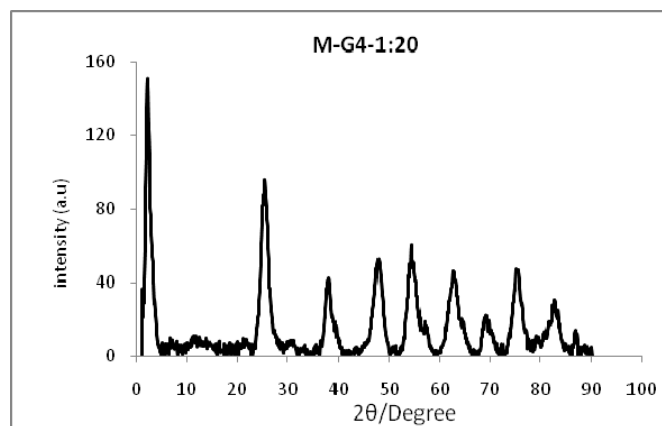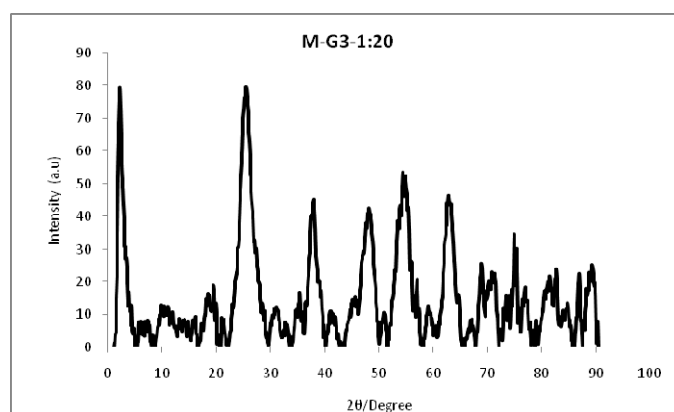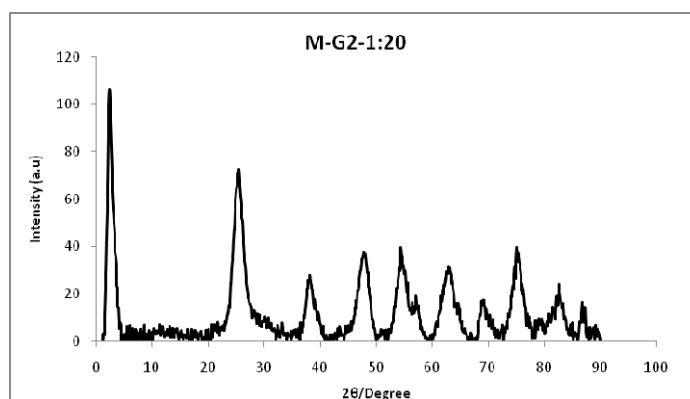

## S8: EDX analysis of hybrid materials

Typical analysis by EDX of M-G4-1:5 and M-G2-1:10

■ YB005\_1\_S001.pgt

FS: 2000

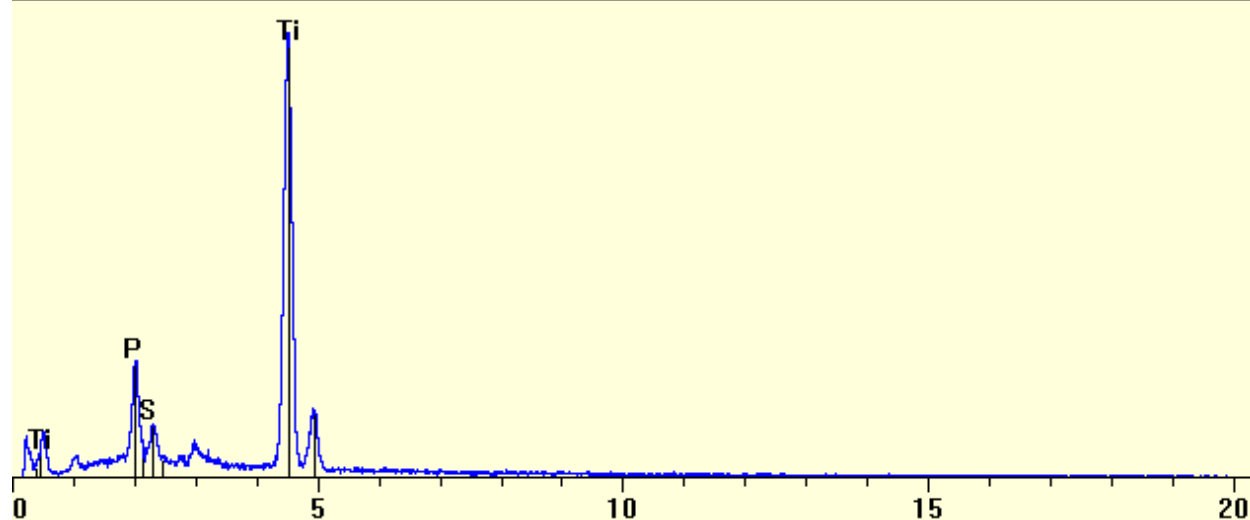

M-G4-1:5 (Experimental ratio dendrimer:Ti = 4.3 from At% of P and Ti)

■ YB017\_1\_S001.pgt

FS: 1400

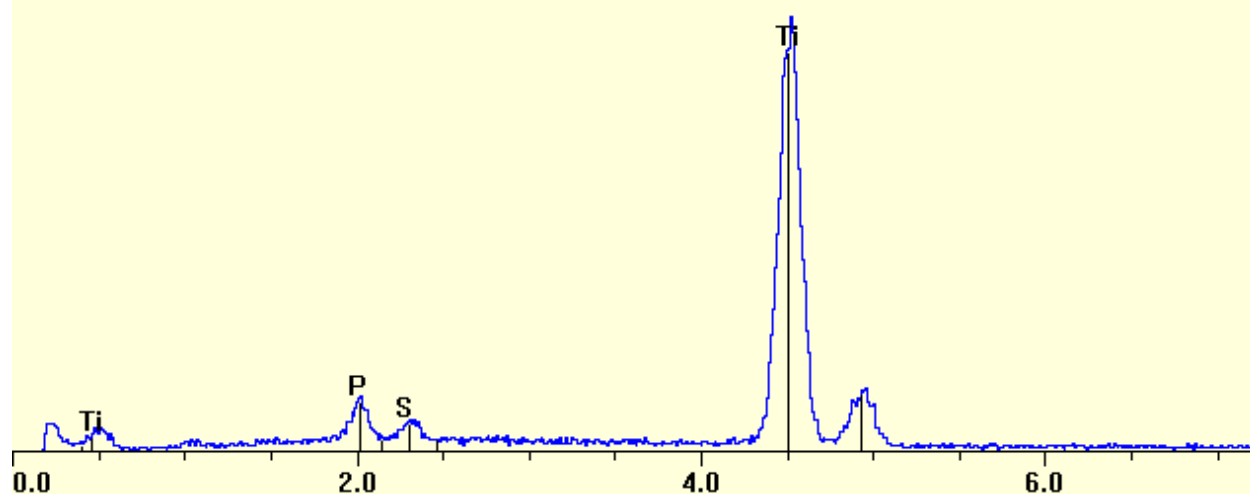

M-G2-1:10 (Experimental ratio dendrimer: Ti = 8.6 from At% of P and Ti)

The homogeneity of hybrid materials and the absence of two separate phases have been ascertained after mapping different regions by EDX coupled SEM. The same ratio (P/Ti or S/Ti) is obtained indicating similar dendrimer-titania composition in the whole of the material.

## S9: Nitrogen sorption analysis of hybrid materials

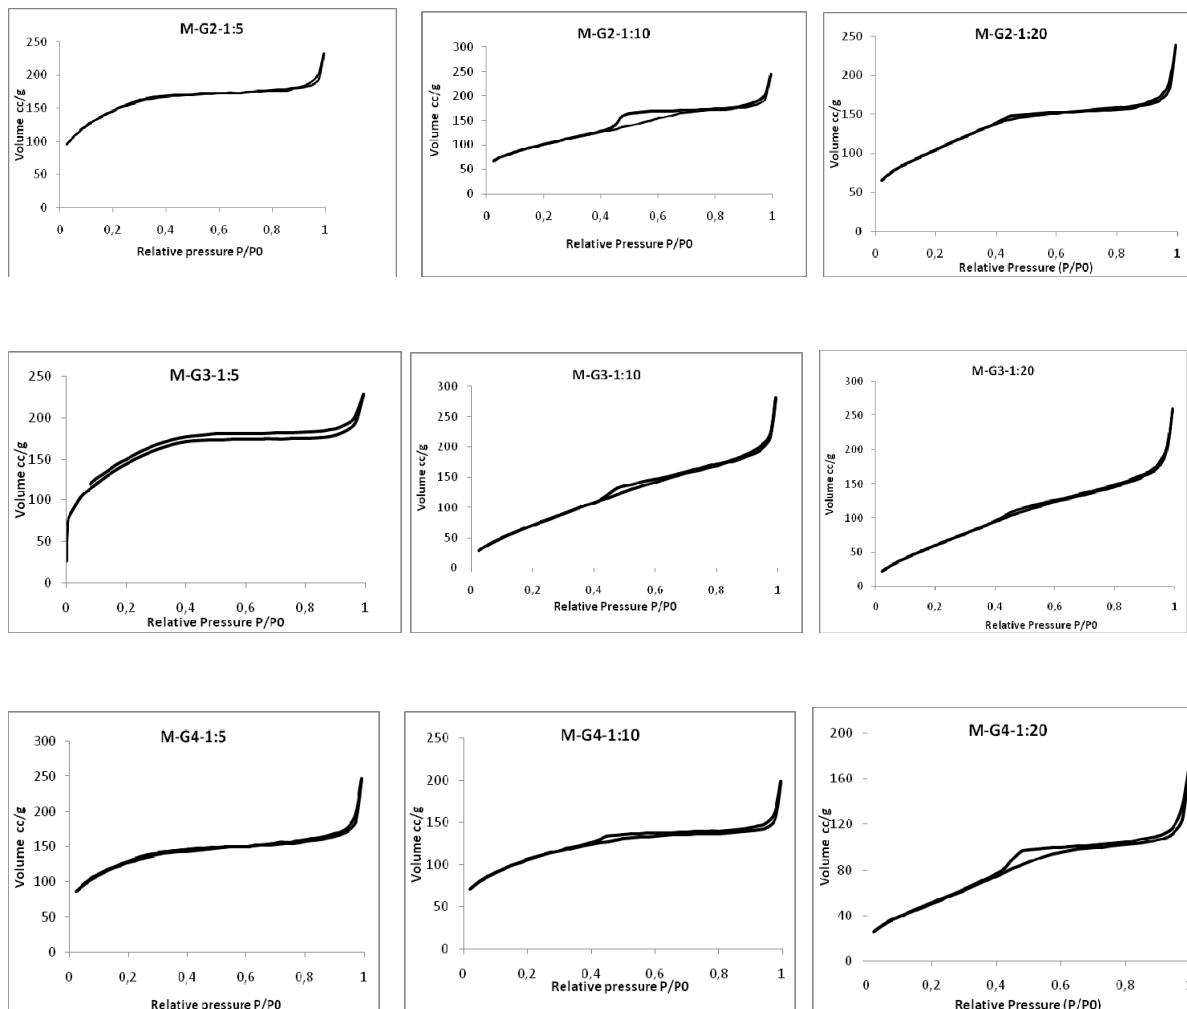

### S10: TG analysis of hybrid materials

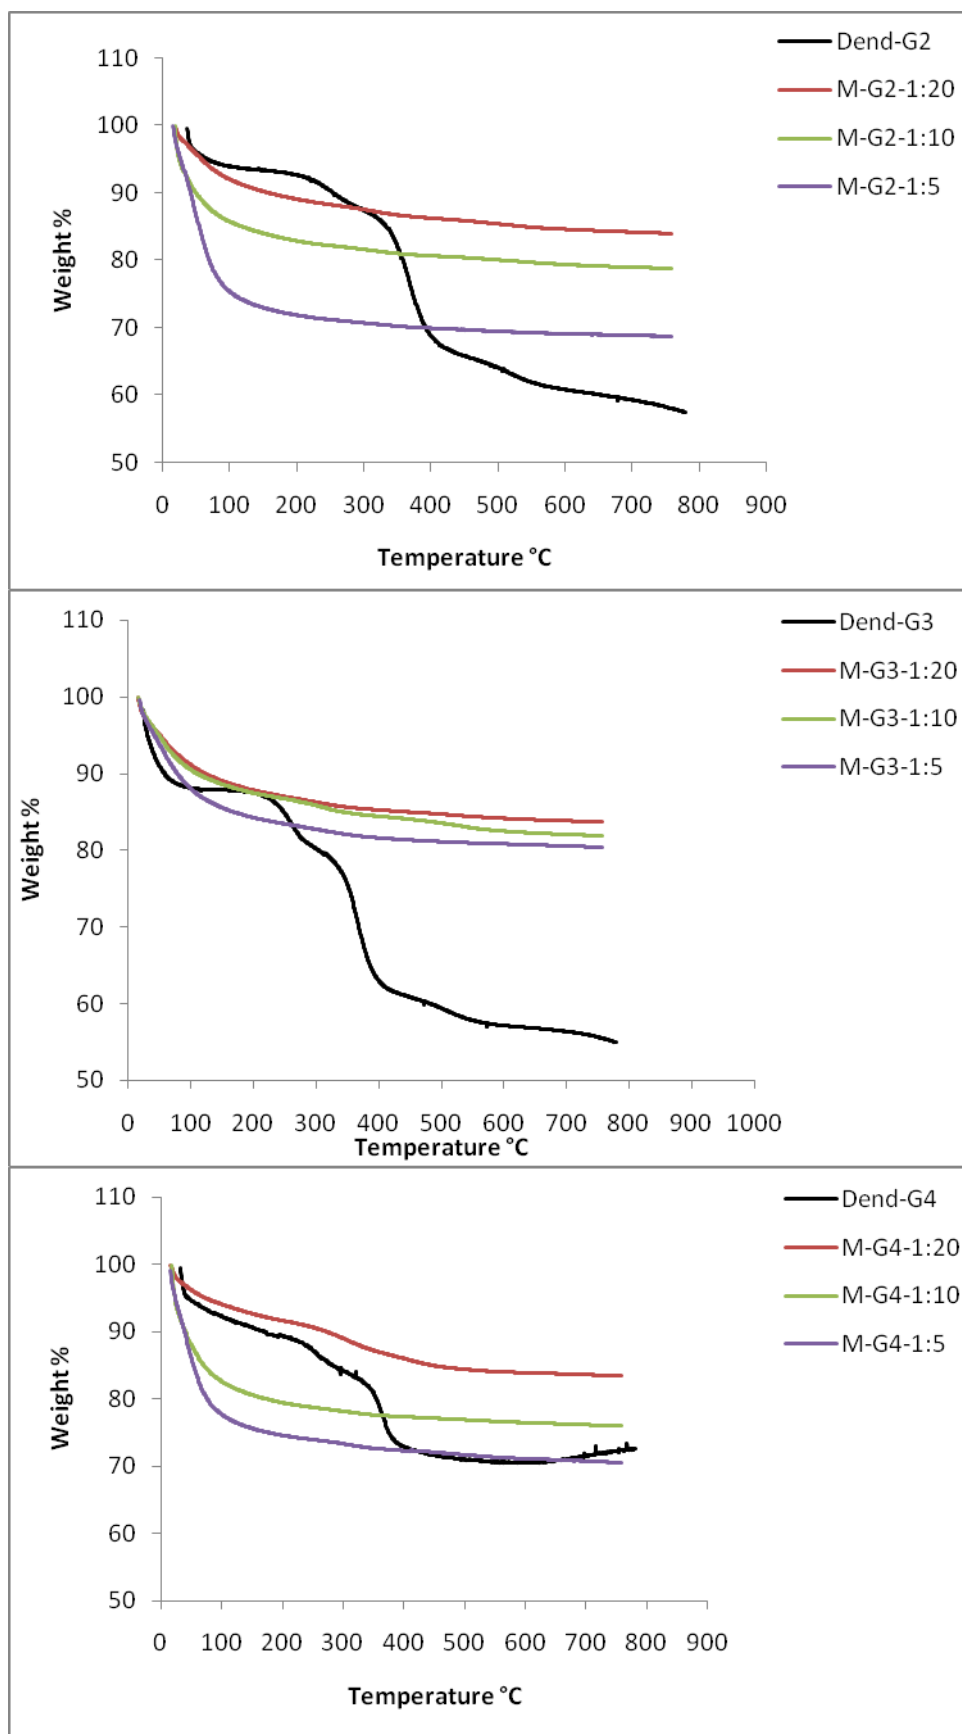

**S11: X-ray diffraction analysis after calcinations.**

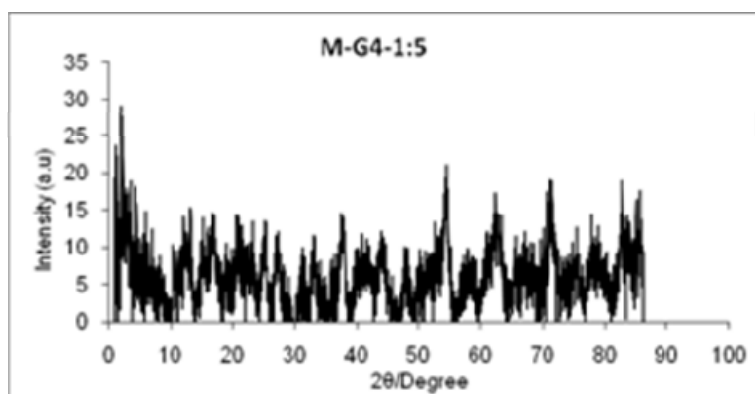

**Crystal size : 5 nm**

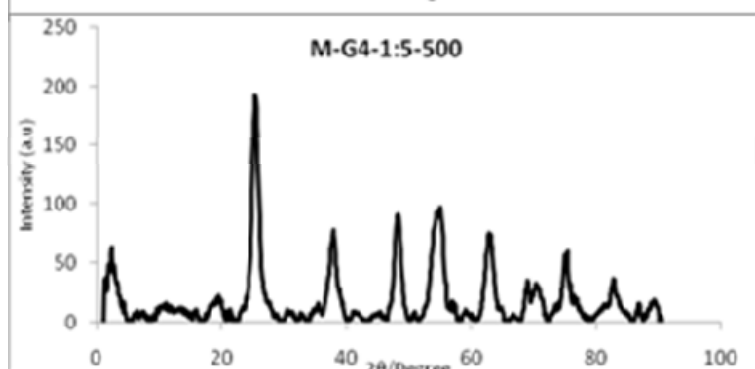

**Crystal size : 6.8 nm**

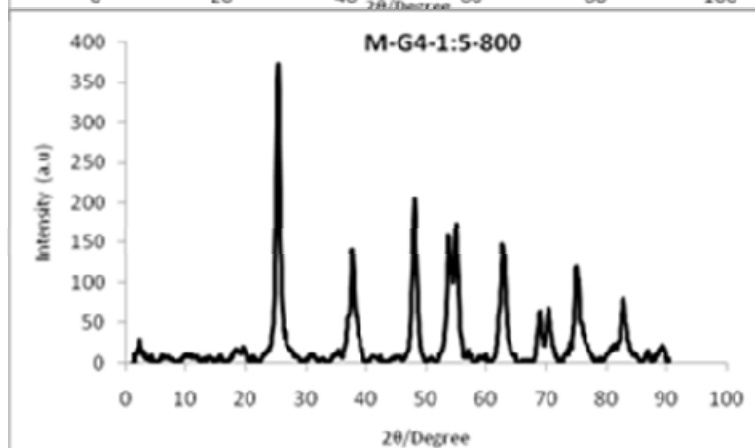

**Crystal size : 9.5 nm**
